# Supplementary material
Source: PubMed Central journal article supplement (PMC7508627)
Supplement: AAC.01261-20-s0001.pdf [file AAC.01261-20-s0001.pdf]

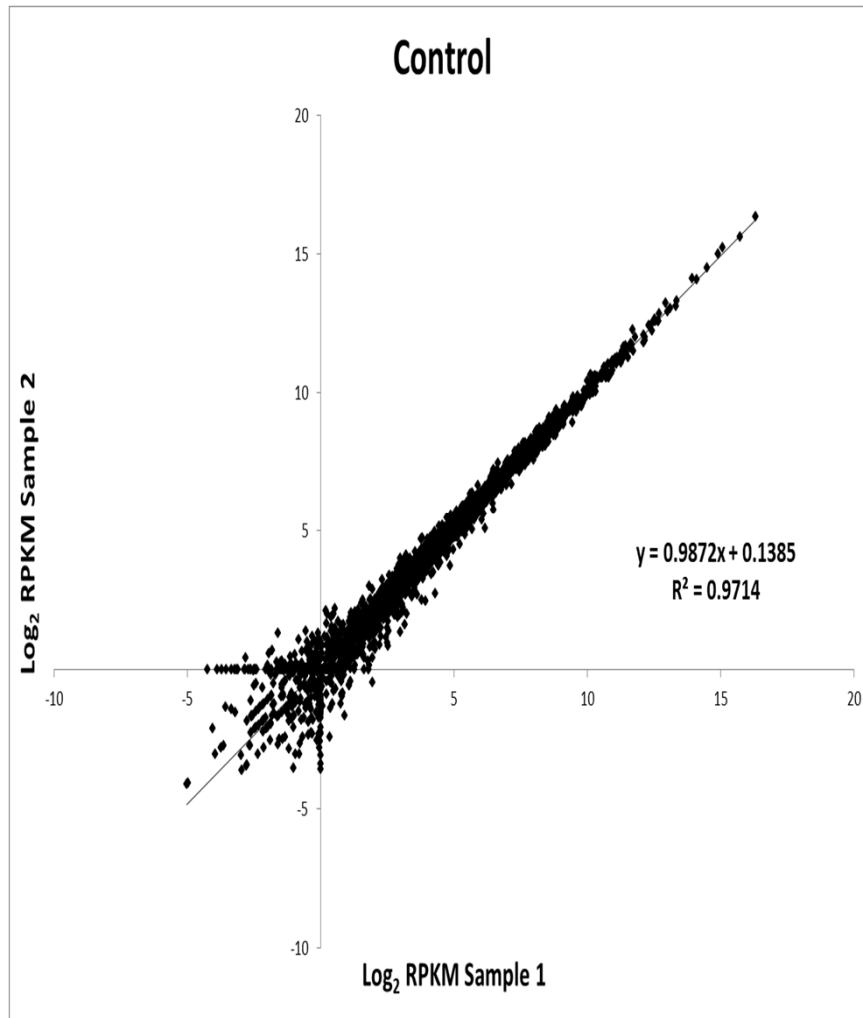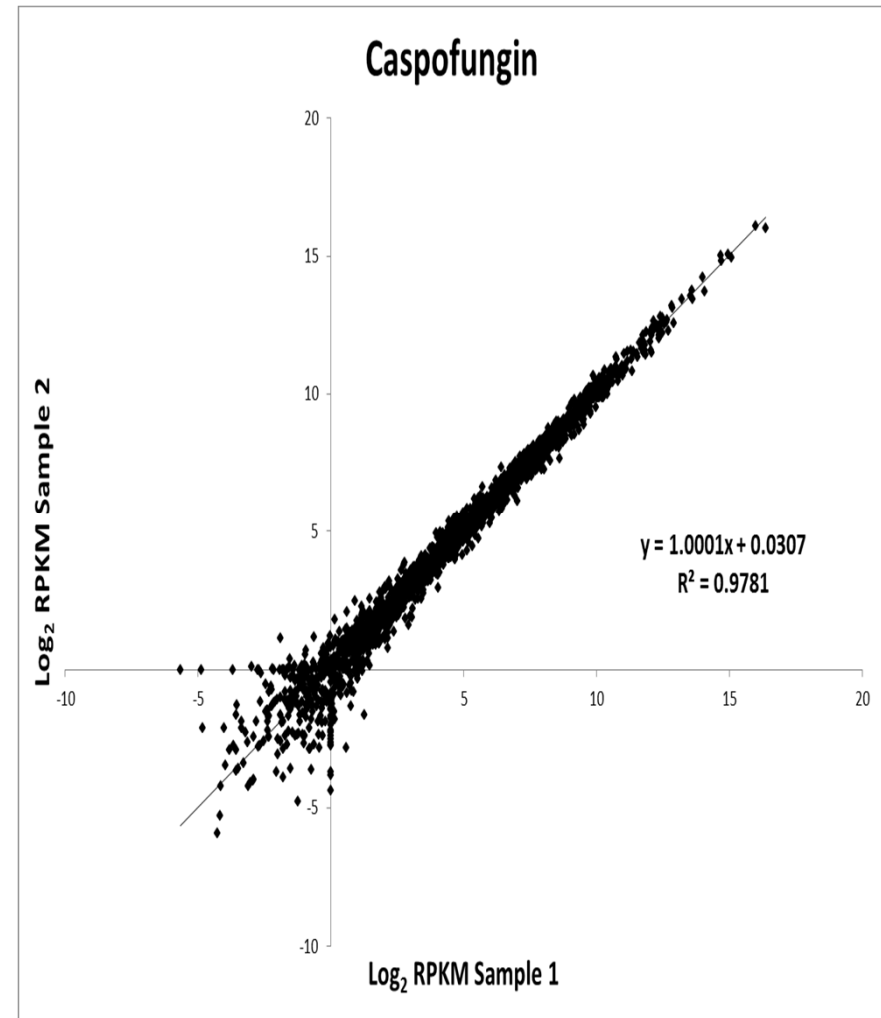

**Figure S1.** Reproducibility of duplicate RNA-seq experiments performed in the absence (Control) or in the presence (Caspofungin) of caspofungin (concentration at 8 mg/L). The expression of genes in different RNA-seq samples was compared using normalized RPKM values calculated as follows: (# reads for the gene\*10<sup>9</sup>)/(# total of reads\*size of the gene).

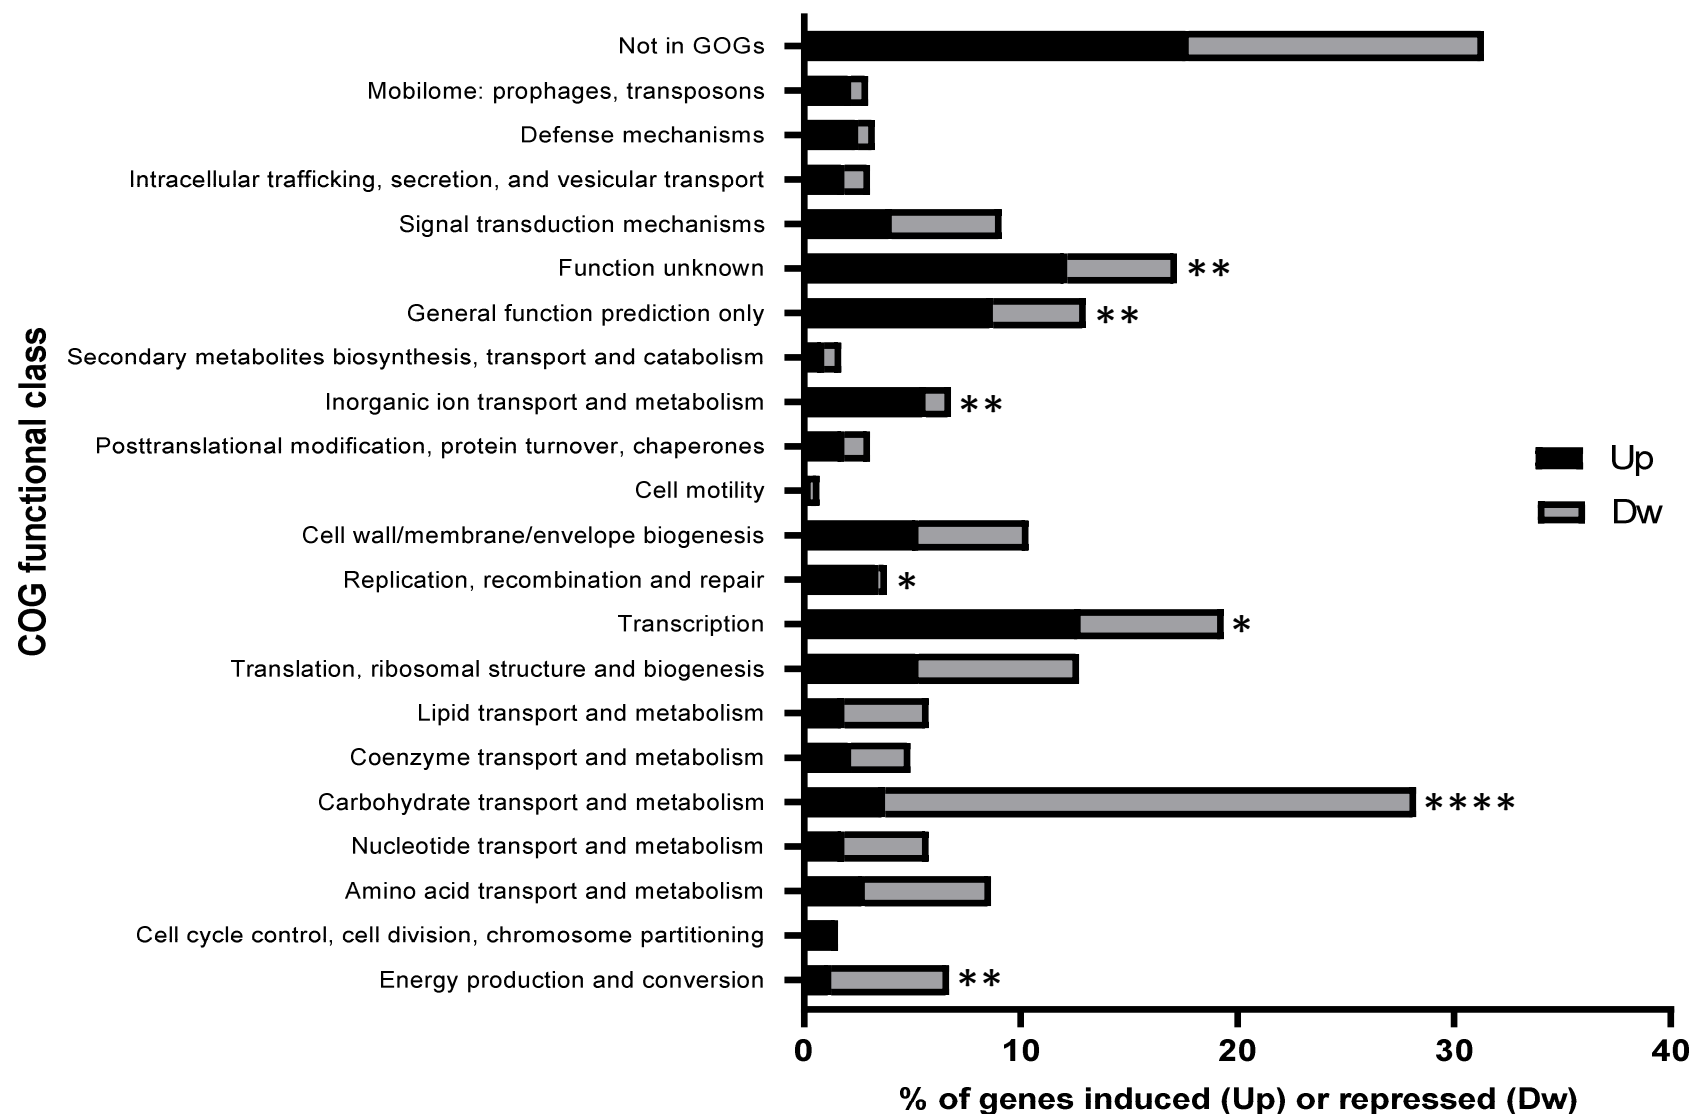

**Figure S2.** Classification in functional categories of the 580 genes significantly induced (n=321) or repressed (n=259) by sub-inhibitory concentration of caspofungin (8 mg/L) in *E. faecium* Aus0004. Percentages of genes with a transcript change in expression level lower or greater than 2 log<sub>2</sub>-fold (with an adjusted p-value <0.1) are represented in white or black bars, respectively. Statistically significant differences (using Fisher's exact test) are indicated as follows: \*, P<0.05; \*\*, P<0.01; \*\*\*\*, P<0.0001.

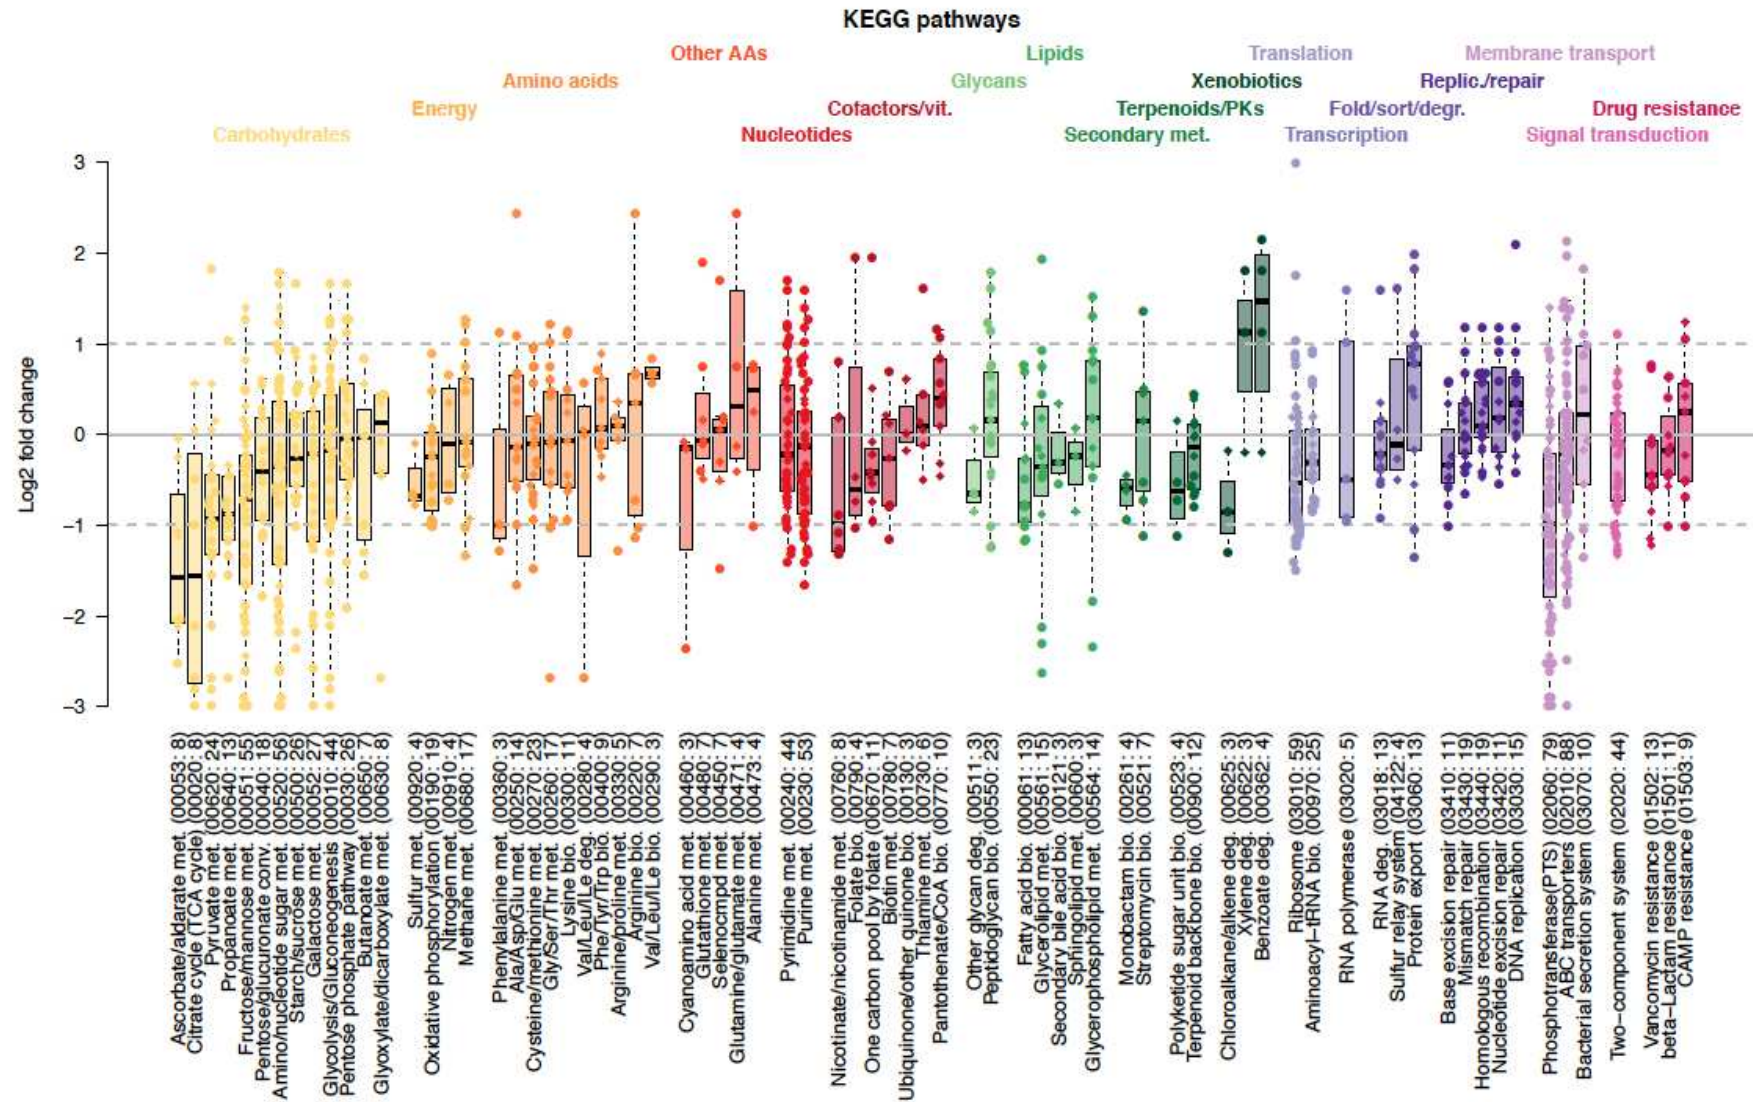

**Figure S3.** Representation and classification of transcripts fold changes levels of the 580 genes significantly induced (n = 321) or repressed (n = 259) by growth in the presence of caspofungin across biological pathways in *E. faecium* Aus0004, according to the KEGG pathways (available in [www.kegg.jp](http://www.kegg.jp)) using the KEGGREST R library.

## References

1. **Lam MMC, Seemann T, Bulach DM, Gladman SL, Chen H, Haring V, Moore RJ, Ballard S, Grayson ML, Johnson PDR, Howden BP, Stinear TP.** 2012. Comparative analysis of the first complete *Enterococcus faecium* genome. *J Bacteriol* 194:2334–2341.
2. **Bozdogan B, Leclercq R.** 1999. Effects of genes encoding resistance to streptogramins A and B on the activity of quinupristin-dalfopristin against *Enterococcus faecium*. *Antimicrob Agents Chemother* 43:2720-2725.
3. **Lebreton F, van Schaik W, Sanguinetti M, Posteraro B, Torelli R, Le Bras F, Verneuil N, Zhang X, Giard J-C, Dhalluin A, Willems RJL, Leclercq R, Cattoir V.** 2012. AsrR is an oxidative stress sensing regulator modulating *Enterococcus faecium* opportunistic traits, antimicrobial resistance, and pathogenicity. *PLoS Pathog* 8:e1002834.
